# Supplementary material for: RAD51 D-loop structures reveal the mechanism of eukaryotic RAD51-mediated strand exchange
Source: Research Square preprint supplement (doi:10.21203/rs.3.rs-6511672/v1), 2025-05-14
Supplement: Supplementary file 3 [file list of folders and file names.docx]

List of Folders and File names

1. Fig 1c map and model_presynaptic:

EMD-64183_sharpen.mrc

9UI4.pdb

1. Fig 1d map and model_postsynaptic:

EMD-64184_sharpen.mrc

9UI5.pdb

1. Fig 2a density map:

Fig 2a_map_sharpen.mrc

1. Fig 2b density map:

Fig 2b_map_sharpen.mrc

1. Fig 2c map and model in Fig 3c_4 bp_D_loop:

EMD-64186_sharpen.mrc

9UI7.pdb

1. Fig 2d map and model in Fig 3h_8 bp_D_loop:

EMD-64187_sharpen.mrc

9UI8

1. Fig 2e map and model in Fig 3l_12 bp_D_loop:

EMD-64188_sharpen.mrc

9UI9.pdb
